# Supplementary material for: Phosphoproteomics of collagen receptor networks reveals SHP-2 phosphorylation downstream of wild-type DDR2 and its lung cancer mutants
Source: Oxford University Press journal article supplement (doi:10.1042/bj20121750), 2013-07-05
Supplement: bj4540501add.pdf [file bj4540501add.pdf]

## SUPPLEMENTARY ONLINE DATA

# Phosphoproteomics of collagen receptor networks reveals SHP-2 phosphorylation downstream of wild-type DDR2 and its lung cancer mutants

Leo K. IWAI\*<sup>1</sup>, Leo S. PAYNE\*<sup>1</sup>, Maciej T. LUCZYNSKI\*, Francis CHANG\*, Huifang XU†, Ryan W. CLINTON‡, Angela PAUL§, Edward A. ESPOSITO‡, Scott GRIDLEY‡, Birgit LEITINGER†, Kristen M. NAEGLE|| and Paul H. HUANG\*<sup>2</sup>

\*Protein Networks Team, Division of Cancer Biology, Institute of Cancer Research, London SW3 6JB, U.K., †National Heart and Lung Institute, Imperial College London, London SW7 2AZ, U.K., ‡Blue Sky Biotech Inc., Worcester, MA 01605, U.S.A., §Cancer Research UK Tumour Cell Signalling Unit, Institute of Cancer Research, London SW3 6JB, U.K., and ||Department of Biomedical Engineering, Washington University in St. Louis, St. Louis, MO 63130, U.S.A.

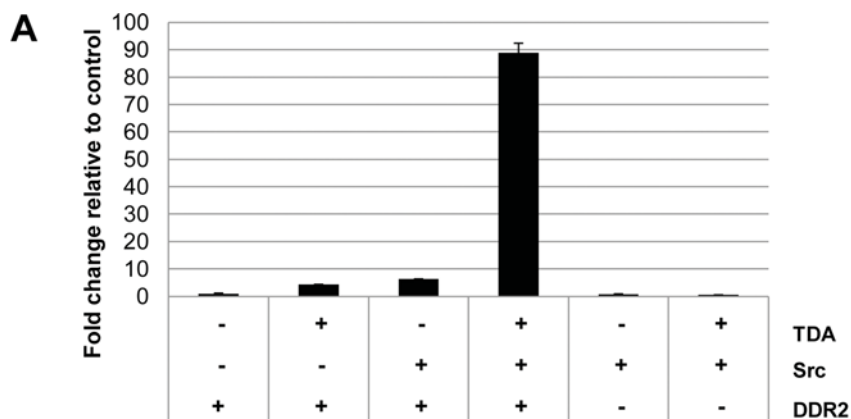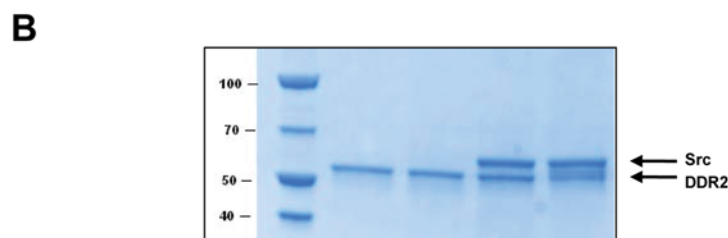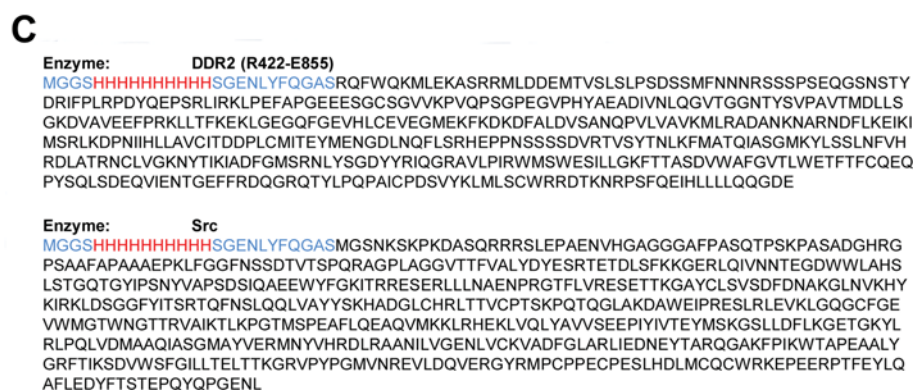

### Figure S1 Details of the DDR2 *in vitro* kinase assay

(A) *In vitro* kinase assay measuring the incorporation of <sup>32</sup>P into the Axltide substrate peptide. Src and DDR2 were mixed at a ratio of 1:20 together with TDA at a 1:10000 (TDA/enzyme) ratio in kinase assay buffer. Src does not phosphorylate the Axltide substrate peptide. (B) Coomassie Brilliant Blue-stained gel of *in vitro* kinase reaction samples that were subjected to LC-MS/MS analysis. (C) Sequence of recombinant DDR2 and Src that were used in the *in vitro* kinase assays.

<sup>1</sup> These authors contributed equally to this work.

<sup>2</sup> To whom correspondence should be addressed (email paul.huang@icr.ac.uk).

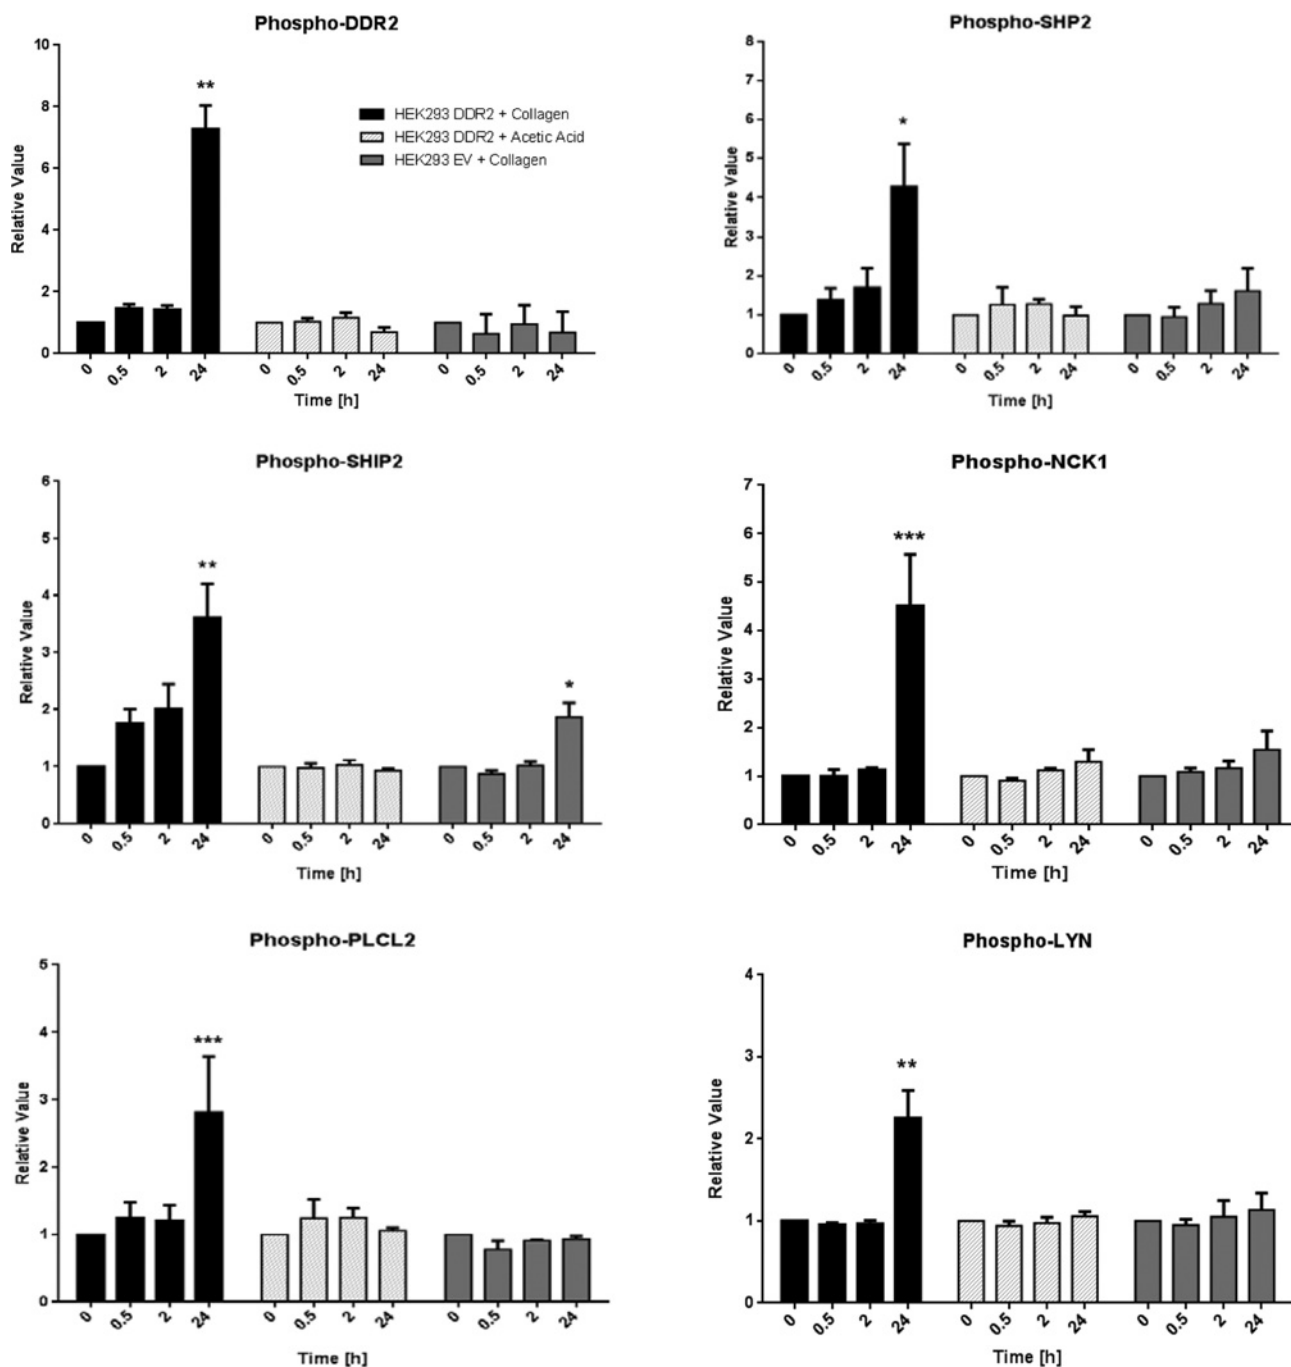

**Figure S2** ELISA measurements of tyrosine phosphorylation levels of DDR2 and its downstream effectors (SHP2, SHIP-2, PLCL2, LYN and NCK1) in HEK-293-DDR2 cells at 0, 0.5, 2 and 24 h post collagen I stimulation ( $n = 4$ )

Values are means  $\pm$  S.E.M. with \*\*\* $P < 0.001$ , \*\* $P < 0.01$  and \* $P < 0.05$ , indicating a significant difference between  $t = 0$  and  $t = 24$  h as determined by paired Student's  $t$  test. As negative controls HEK-293-EV cells treated with collagen I and HEK-293-DDR2 cells treated with acetic acid were used.

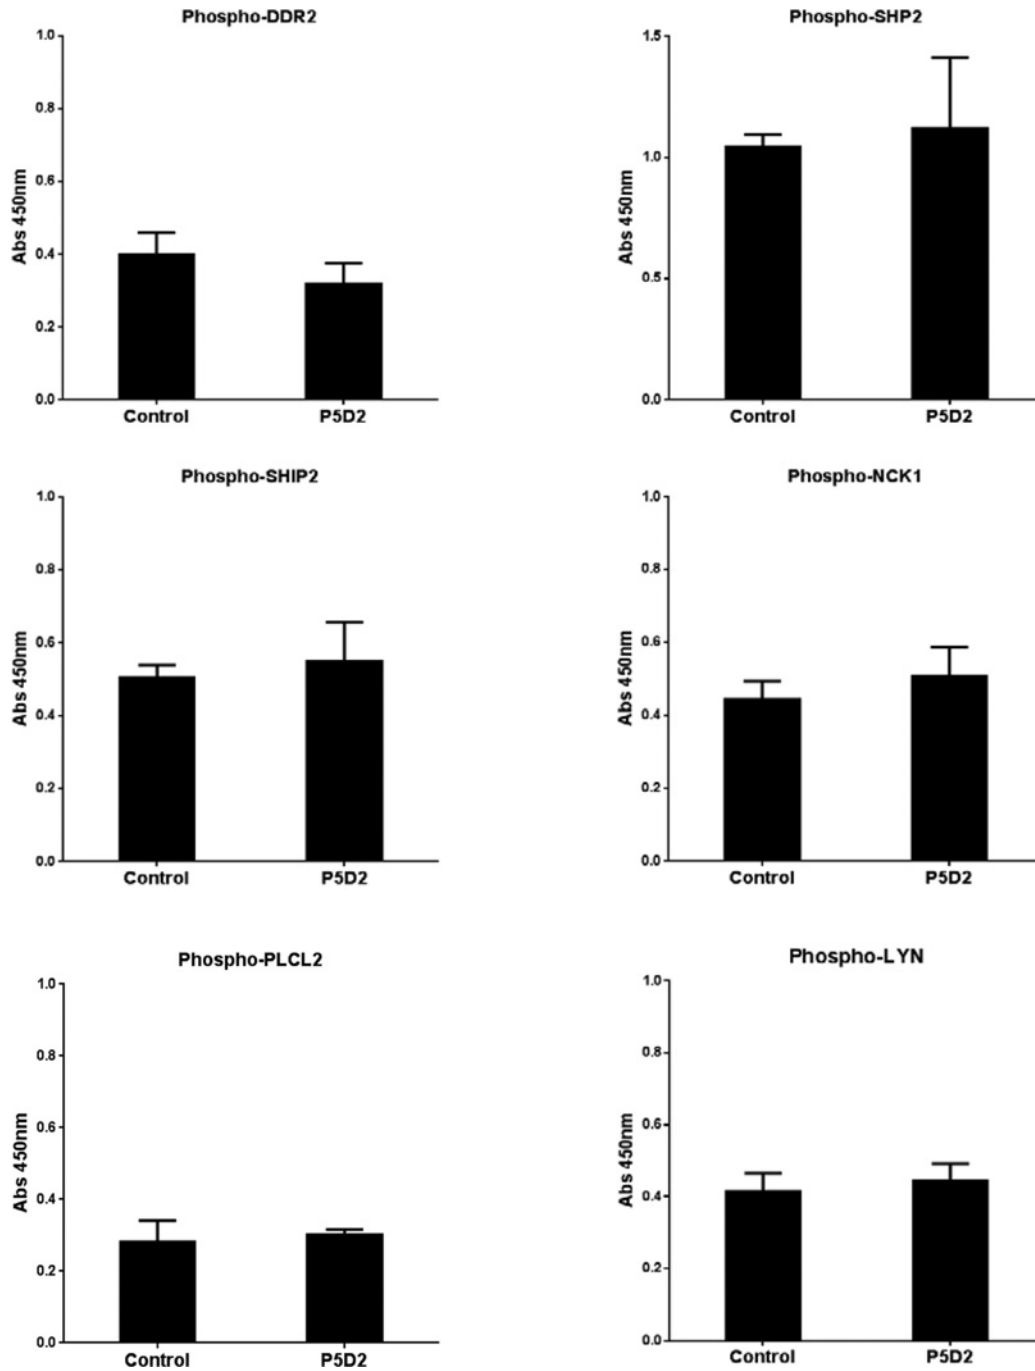

**Figure S3** ELISA measurements of tyrosine phosphorylation levels of DDR2 and its downstream effectors (SHP2, SHIP-2, PLCL2, LYN and NCK1) in HEK-293-DDR2 at 24 h post collagen I stimulation ( $n = 4$ ) in the presence or absence (control) of the P5D2 integrin  $\beta$ 1-blocking antibody

Values are means  $\pm$  S.E.M. There are no statistical differences between the P5D2 and control samples.

**Table S1 Primer sequences for generation of DDR2 mutants**

The bases shown in bold indicate the nucleotide that was mutated from the corresponding wild-type to generate mutants using site-directed mutagenesis methodology.

| Mutant | Direction | Primer sequence (5'→3')                        |
|--------|-----------|------------------------------------------------|
| L63V   | Forward   | CTGCCAAATATGGAAGGG <b>GT</b> GACTCAGAAGAAGGG   |
|        | Reverse   | CCCTTCTCTGAGTCC <b>ACC</b> CTCCATATTTGGCAG     |
| G505S  | Forward   | GAGTCAGGCTGCAGC <b>AG</b> TGTTGTGAAGCCAG       |
|        | Reverse   | CTGGCTTCACAAC <b>ACT</b> GCTGCAGCCTGACTC       |
| K608M  | Forward   | GTCTGGTGGCTGTGAT <b>GT</b> ATGCTCCGAGCAGATG    |
|        | Reverse   | CATCTGCTCGGAGC <b>ATC</b> ATCACAGCCACCAGGAC    |
| K608E  | Forward   | TGTCTGGTGGCTGT <b>GG</b> AGATGCTCCGAGCAGATG    |
|        | Reverse   | CATCTGCTCGGAGC <b>CTC</b> CACAGCCACCAGGACA     |
| I638F  | Forward   | CTCAAGGACCCAAACAT <b>CT</b> TCCATCTATTAGCTGTGT |
|        | Reverse   | ACACAGCTAATAGATGGA <b>AG</b> ATGTTGGGTCCTTGAG  |

**Table S2 Heavy phosphopeptide sequences used in the SRM assay**

| Phosphosite             | Peptide                                                                                                                 | Amount spiked per sample |
|-------------------------|-------------------------------------------------------------------------------------------------------------------------|--------------------------|
| DDR2 Tyr <sup>481</sup> | IFPLRPD[Tyr(PO <sub>3</sub> H <sub>2</sub> )]QEPS[Arg( <sup>13</sup> C <sub>6</sub> , <sup>15</sup> N <sub>4</sub> )]   | 500 fmol                 |
| DDR2 Tyr <sup>684</sup> | TVS[Tyr(PO <sub>3</sub> H <sub>2</sub> )]TNL[Lys( <sup>13</sup> C <sub>6</sub> , <sup>15</sup> N <sub>2</sub> )]        | 100 fmol                 |
| DDR2 Tyr <sup>736</sup> | NL[Tyr(PO <sub>3</sub> H <sub>2</sub> )]SGDY[Arg( <sup>13</sup> C <sub>6</sub> , <sup>15</sup> N <sub>4</sub> )]        | 100 fmol                 |
| DDR2 Tyr <sup>740</sup> | NLYSGD[Tyr(PO <sub>3</sub> H <sub>2</sub> )]Y[Arg( <sup>13</sup> C <sub>6</sub> , <sup>15</sup> N <sub>4</sub> )]       | 200 fmol                 |
| SHP2 Tyr <sup>62</sup>  | IQNTGD[Tyr(PO <sub>3</sub> H <sub>2</sub> )]YDLYGGE[Lys( <sup>13</sup> C <sub>6</sub> , <sup>15</sup> N <sub>2</sub> )] | 2.5 pmol                 |

**Table S3 Transitions used for the SRM assay**

Values in bold indicate representative transitions used in the Figures.

| Phosphosite                          | Peptide                                                                                                                 | Transition (Q1/Q3) | Fragment ion ID | Collision energy (V) |
|--------------------------------------|-------------------------------------------------------------------------------------------------------------------------|--------------------|-----------------|----------------------|
| DDR2 Tyr <sup>481</sup> (heavy)      | IFPLRPD[Tyr(PO <sub>3</sub> H <sub>2</sub> )]QEPS[Arg( <sup>13</sup> C <sub>6</sub> , <sup>15</sup> N <sub>4</sub> )]   | <b>569.9/369.2</b> | Y3              | 36.6                 |
|                                      |                                                                                                                         | 569.9/869.3        | Y6              | 36.6                 |
|                                      |                                                                                                                         | 569.9/498.3        | Y4              | 36.6                 |
| DDR2 Tyr <sup>684</sup> (heavy)      | TVS[Tyr(PO <sub>3</sub> H <sub>2</sub> )]TNL[Lys( <sup>13</sup> C <sub>6</sub> , <sup>15</sup> N <sub>2</sub> )]        | <b>507.2/813.3</b> | Y6              | 28.7                 |
|                                      |                                                                                                                         | 507.2/201.1        | B2              | 28.7                 |
|                                      |                                                                                                                         | 507.2/726.3        | Y5              | 28.7                 |
|                                      |                                                                                                                         | 507.2/483.3        | Y4              | 28.7                 |
|                                      |                                                                                                                         | 620.7/1013.3       | Y7              | 35.0                 |
| DDR2 Tyr <sup>736</sup> (heavy)      | NL[Tyr(PO <sub>3</sub> H <sub>2</sub> )]SGDY[Arg( <sup>13</sup> C <sub>6</sub> , <sup>15</sup> N <sub>4</sub> )]        | <b>620.7/770.3</b> | Y6              | 35.0                 |
|                                      |                                                                                                                         | 620.7/511.3        | Y3              | 35.0                 |
|                                      |                                                                                                                         | 620.7/683.3        | Y5              | 35.0                 |
|                                      |                                                                                                                         | 620.7/1013.3       | Y7              | 35.0                 |
|                                      |                                                                                                                         | 620.7/591.1        | Y3              | 35.0                 |
| DDR2 Tyr <sup>740</sup> (heavy)      | NLYSGD[Tyr(PO <sub>3</sub> H <sub>2</sub> )]Y[Arg( <sup>13</sup> C <sub>6</sub> , <sup>15</sup> N <sub>4</sub> )]       | <b>620.7/391.2</b> | B3              | 35.0                 |
|                                      |                                                                                                                         | 620.7/591.1        | Y3              | 35.0                 |
|                                      |                                                                                                                         | 620.7/706.2        | Y4              | 35.0                 |
|                                      |                                                                                                                         | 912.4/789.4        | Y7              | 53.7                 |
|                                      |                                                                                                                         | 912.4/674.4        | Y6              | 53.7                 |
| SHP2 Tyr <sup>62</sup> (heavy)       | IQNTGD[Tyr(PO <sub>3</sub> H <sub>2</sub> )]YDLYGGE[Lys( <sup>13</sup> C <sub>6</sub> , <sup>15</sup> N <sub>2</sub> )] | 912.4/561.3        | Y5              | 53.7                 |
|                                      |                                                                                                                         | <b>912.4/398.2</b> | Y4              | 53.7                 |
|                                      |                                                                                                                         | <b>566.6/359.2</b> | Y3              | 36.6                 |
|                                      |                                                                                                                         | 566.6/859.3        | Y6              | 36.6                 |
|                                      |                                                                                                                         | 566.6/488.3        | Y4              | 36.6                 |
| DDR2 Tyr <sup>481</sup> (endogenous) | IFPLRPD[Tyr(PO <sub>3</sub> H <sub>2</sub> )]QEPSR                                                                      | <b>503.2/805.3</b> | Y6              | 28.7                 |
|                                      |                                                                                                                         | 503.2/201.1        | B2              | 28.7                 |
|                                      |                                                                                                                         | 503.2/718.3        | Y5              | 28.7                 |
|                                      |                                                                                                                         | 503.2/475.3        | Y4              | 28.7                 |
|                                      |                                                                                                                         | 615.7/1003.3       | Y7              | 35.0                 |
| DDR2 Tyr <sup>684</sup> (endogenous) | TVS[Tyr(PO <sub>3</sub> H <sub>2</sub> )]TNLK                                                                           | <b>615.7/760.3</b> | Y6              | 35.0                 |
|                                      |                                                                                                                         | 615.7/501.2        | Y3              | 35.0                 |
|                                      |                                                                                                                         | 615.7/673.3        | Y5              | 35.0                 |
|                                      |                                                                                                                         | 615.7/1003.3       | Y7              | 35.0                 |
|                                      |                                                                                                                         | <b>615.7/391.2</b> | B3              | 35.0                 |
| DDR2 Tyr <sup>736</sup> (endogenous) | NL[Tyr(PO <sub>3</sub> H <sub>2</sub> )]SGDYR                                                                           | 615.7/581.1        | Y3              | 35.0                 |
|                                      |                                                                                                                         | 615.7/696.2        | Y4              | 35.0                 |
|                                      |                                                                                                                         | 908.4/781.37       | Y7              | 53.7                 |
|                                      |                                                                                                                         | 908.4/666.4        | Y6              | 53.7                 |
|                                      |                                                                                                                         | 908.4/553.3        | Y5              | 53.7                 |
| SHP2 Tyr <sup>62</sup> (endogenous)  | IQNTGD[Tyr(PO <sub>3</sub> H <sub>2</sub> )]YDLYGGEK                                                                    | <b>908.4/390.2</b> | Y4              | 53.7                 |

**Table S4 Dataset preparation and MCAM implementation**

Parameters used for the initial MCAM analysis and pruned from the final round of feature selection. FFT, fast Fourier transform.

| Parameter              | Original parameters of clustering                                                          | Removed during feature selection |
|------------------------|--------------------------------------------------------------------------------------------|----------------------------------|
| K                      | 5, 8, 11, 14, 17, 20, 23, 26, 29                                                           | 5                                |
| Transform              | Centre, FFT, differential, no transform, z-score, normMax, rangeScale, square root, pareto | Centre, FFT, differential        |
| Distance               | Correlation, Euclidean, cityblock, cosine, Chebychev                                       | Correlation                      |
| Algorithm              | Hierarchical, k-means, affinity propagation, self-organizing maps                          | Hierarchical                     |
| Number of cluster sets | 950                                                                                        | 216 (remaining)                  |

**Table S5 Phosphorylation sites in the top seven clusters in MCAM analysis**

The sites in bold highlight the SHIP-2 and DDR2 phosphorylation sites in each cluster.

| Cluster 1                     | Cluster 2                                        | Cluster 3                     | Cluster 4                                     | Cluster 5                  | Cluster 6                                     | Cluster 7                                       |
|-------------------------------|--------------------------------------------------|-------------------------------|-----------------------------------------------|----------------------------|-----------------------------------------------|-------------------------------------------------|
| PFDN6 Tyr <sup>82</sup>       | SF3B14 Tyr <sup>86</sup>                         | BAIAP2 Tyr <sup>491</sup>     | EDC4 Ser <sup>723</sup>                       | MYL9 Thr <sup>19</sup>     | AAK1 Ser <sup>637</sup>                       | PRKAR1A Ser <sup>83</sup>                       |
| BANF1 Tyr <sup>43</sup>       | <b>DDR2 Tyr<sup>684</sup></b>                    | SCRIB Tyr <sup>1360</sup>     | SFRS15 Ser <sup>154</sup>                     | PYGL Ser <sup>15</sup>     | ZC3H13 Ser <sup>64</sup>                      | TPR Ser <sup>2155</sup>                         |
| SHIP-2 Tyr <sup>986</sup>     | SDCBP Tyr <sup>50</sup>                          | SNX9 Tyr <sup>269</sup>       | NOC2L Ser <sup>672</sup> , Ser <sup>673</sup> | SHIP-2 Tyr <sup>1135</sup> | SRRM2 Ser <sup>1987</sup>                     | SRRM2 Ser <sup>2100</sup> , Thr <sup>2104</sup> |
| UTRN Tyr <sup>3111</sup>      | EPS15L1 Tyr <sup>74</sup>                        | TUBB Tyr <sup>340</sup>       | CCDC88A Tyr <sup>1799</sup>                   | HSPA1A Tyr <sup>611</sup>  | SRRM2 Thr <sup>1208</sup>                     | TP53BP1 Ser <sup>380</sup>                      |
| MAGOH Tyr <sup>123</sup>      | <b>DDR2 Tyr<sup>736</sup></b>                    | RNPS1 Tyr <sup>205</sup>      | MAPK14 Tyr <sup>182</sup>                     | AKT1S1 Ser <sup>183</sup>  | SRRM2 Ser <sup>1694</sup>                     | MAP1S Ser <sup>657</sup>                        |
| <b>SHIP2 Tyr<sup>62</sup></b> | ITSN1 Tyr <sup>1132</sup>                        | IGF2BP2 Tyr <sup>40</sup>     | TBC1D15 Ser <sup>227</sup>                    | TRIM28 Tyr <sup>517</sup>  | RPLP1 Ser <sup>101</sup> , Ser <sup>104</sup> | SRRM2 Ser <sup>2272</sup>                       |
| PSAT1 Tyr <sup>346</sup>      | NCK1 Tyr <sup>112</sup>                          | DDR1 Tyr <sup>796</sup>       | CLPB Ser <sup>23</sup>                        | PTPRA Tyr <sup>798</sup>   | KLC2 Ser <sup>581</sup>                       | TNKS1BP1 Ser <sup>691</sup>                     |
| LCP1 Tyr <sup>28</sup>        | IGF2BP3 Tyr <sup>39</sup>                        | ERK1 Tyr <sup>204</sup>       | RPLP1 Ser <sup>101</sup>                      | SYK Tyr <sup>323</sup>     | SPTAN1 Ser <sup>1217</sup>                    | SRRM2 Thr <sup>1492</sup>                       |
| PIN4 Tyr <sup>122</sup>       | PLCL2 Tyr <sup>784</sup>                         | VIM Tyr <sup>117</sup>        | CRKRS Ser <sup>685</sup> , Ser <sup>681</sup> |                            |                                               | STMN1 Ser <sup>16</sup> , Ser <sup>25</sup>     |
| EDC4 Ser <sup>729</sup>       | <b>DDR2 Tyr<sup>736</sup>, Tyr<sup>740</sup></b> | LYN Tyr <sup>306</sup>        | JUN Ser <sup>73</sup>                         |                            |                                               | SRRM2 Ser <sup>1179</sup>                       |
| <b>DDR2 Tyr<sup>740</sup></b> | AGFG1 Tyr <sup>327</sup>                         | HSPA1A Tyr <sup>41</sup>      | SPAG9 Thr <sup>217</sup>                      |                            |                                               |                                                 |
| CLTC Tyr <sup>1487</sup>      | ELMO2 Tyr <sup>48</sup>                          | LPP Tyr <sup>296</sup>        | SFRS1 Tyr <sup>189</sup>                      |                            |                                               |                                                 |
| SF3B14 Tyr <sup>61</sup>      | ANKRD39 Tyr <sup>65</sup>                        | <b>DDR2 Tyr<sup>813</sup></b> |                                               |                            |                                               |                                                 |
| FASN Tyr <sup>130</sup>       | ACBD3 Ser <sup>43</sup>                          | PABPC1 Tyr <sup>54</sup>      |                                               |                            |                                               |                                                 |
| ITSN1 Tyr <sup>1054</sup>     | ADD1 Tyr <sup>407</sup>                          |                               |                                               |                            |                                               |                                                 |
| PIK3C2A Tyr <sup>1595</sup>   |                                                  |                               |                                               |                            |                                               |                                                 |
| TRAP1 Tyr <sup>498</sup>      |                                                  |                               |                                               |                            |                                               |                                                 |
| DDR1 Tyr <sup>792</sup>       |                                                  |                               |                                               |                            |                                               |                                                 |
| GTF2E1 Tyr <sup>91</sup>      |                                                  |                               |                                               |                            |                                               |                                                 |
| AK2 Tyr <sup>190</sup>        |                                                  |                               |                                               |                            |                                               |                                                 |
| TUBGCP3 Tyr <sup>114</sup>    |                                                  |                               |                                               |                            |                                               |                                                 |
| PSMC3 Tyr <sup>132</sup>      |                                                  |                               |                                               |                            |                                               |                                                 |
| ACTB Tyr <sup>218</sup>       |                                                  |                               |                                               |                            |                                               |                                                 |

**Table S6 Co-occurrence frequency listed by the DDR2 phosphorylation sites**The sites in bold highlight SHP-2 Tyr<sup>62</sup> phosphorylation and their respective co-occurrence frequency with specific DDR2 phosphorylation sites.

| DDR2 Tyr <sup>481</sup>  |                         | DDR2 Tyr <sup>684</sup>                      |                         | DDR2 Tyr <sup>736</sup>                      |                         | DDR2 Tyr <sup>740</sup>      |                         | DDR2 Tyr <sup>736</sup> , Tyr <sup>740</sup> |                         | DDR2 Tyr <sup>813</sup>                      |                         |
|--------------------------|-------------------------|----------------------------------------------|-------------------------|----------------------------------------------|-------------------------|------------------------------|-------------------------|----------------------------------------------|-------------------------|----------------------------------------------|-------------------------|
| Phosphorylation site     | Co-occurrence frequency | Phosphorylation site                         | Co-occurrence frequency | Phosphorylation site                         | Co-occurrence frequency | Phosphorylation site         | Co-occurrence frequency | Phosphorylation site                         | Co-occurrence frequency | Phosphorylation site                         | Co-occurrence frequency |
| DDR2 Tyr <sup>481</sup>  | 1.00                    | DDR2 Tyr <sup>684</sup>                      | 1.00                    | DDR2 Tyr <sup>736</sup>                      | 1.00                    | PFDN6 Tyr <sup>82</sup>      | 1.00                    | DDR2 Tyr <sup>736</sup> Tyr <sup>740</sup>   | 1.00                    | DDR2 Tyr <sup>813</sup>                      | 1.00                    |
| CRKL Tyr <sup>207</sup>  | 0.67                    | AGFG1 Tyr <sup>327</sup>                     | 0.91                    | SF3B14 Tyr <sup>86</sup>                     | 0.94                    | DDR2 Tyr <sup>740</sup>      | 1.00                    | ITSN1 Tyr <sup>1132</sup>                    | 0.88                    | ERK1 Tyr <sup>204</sup>                      | 0.84                    |
| TPI1 Ser <sup>21</sup>   | 0.62                    | NCK1 Tyr <sup>112</sup>                      | 0.90                    | NCK1 Tyr <sup>112</sup>                      | 0.91                    | PIK3C2A Tyr <sup>1595</sup>  | 0.98                    | ELMO2 Tyr <sup>48</sup>                      | 0.88                    | LYN Tyr <sup>306</sup>                       | 0.82                    |
| RANBP1 Ser <sup>60</sup> | 0.55                    | DDR2 Tyr <sup>736</sup>                      | 0.86                    | IGF2BP3 Tyr <sup>39</sup>                    | 0.91                    | DDR1 Tyr <sup>792</sup>      | 0.97                    | EPS15L1 Tyr <sup>74</sup>                    | 0.83                    | LPP Tyr <sup>296</sup>                       | 0.82                    |
| COIL Ser <sup>301</sup>  | 0.51                    | IGF2BP3 Tyr <sup>39</sup>                    | 0.86                    | SDCBP Tyr <sup>50</sup>                      | 0.87                    | LCP1 Tyr <sup>28</sup>       | 0.97                    | ANKRD39 Tyr <sup>65</sup>                    | 0.83                    | SCRIB Tyr <sup>1360</sup>                    | 0.81                    |
| WDR75 Ser <sup>796</sup> | 0.50                    | SDCBP Tyr <sup>50</sup>                      | 0.83                    | DDR2 Tyr <sup>684</sup>                      | 0.86                    | DDR2 Tyr <sup>684</sup>      | 0.97                    | RNPS1 Tyr <sup>205</sup>                     | 0.80                    | RNPS1 Tyr <sup>205</sup>                     | 0.80                    |
|                          |                         | ANKRD39 Tyr <sup>65</sup>                    | 0.82                    | AGFG1 Tyr <sup>327</sup>                     | 0.86                    | ACTB Tyr <sup>218</sup>      | 0.97                    | ADD1 Tyr <sup>407</sup>                      | 0.79                    | DDR1 Tyr <sup>796</sup>                      | 0.80                    |
|                          |                         | EPS15L1 Tyr <sup>74</sup>                    | 0.82                    | ADD1 Tyr <sup>407</sup>                      | 0.85                    | BANF1 Tyr <sup>43</sup>      | 0.95                    | NCK1 Tyr <sup>112</sup>                      | 0.78                    | SNX9 Tyr <sup>269</sup>                      | 0.78                    |
|                          |                         | SF3B14 Tyr <sup>86</sup>                     | 0.81                    | ITSN1 Tyr <sup>1054</sup>                    | 0.84                    | EDC4 Ser <sup>729</sup>      | 0.93                    | SCRIB Tyr <sup>1360</sup>                    | 0.78                    | TUBB Tyr <sup>340</sup>                      | 0.77                    |
|                          |                         | ADD1 Tyr <sup>407</sup>                      | 0.81                    | ANKRD39 Tyr <sup>65</sup>                    | 0.84                    | CLTC Tyr <sup>1487</sup>     | 0.93                    | IGF2BP3 Tyr <sup>39</sup>                    | 0.77                    | BAIAP2 Tyr <sup>491</sup>                    | 0.73                    |
|                          |                         | ELMO2 Tyr <sup>48</sup>                      | 0.77                    | EPS15L1 Tyr <sup>74</sup>                    | 0.83                    | SF3B14 Tyr <sup>61</sup>     | 0.92                    | DDR1 Tyr <sup>796</sup>                      | 0.77                    | IGF2BP2 Tyr <sup>40</sup>                    | 0.72                    |
|                          |                         | ITSN1 Tyr <sup>1132</sup>                    | 0.76                    | ACBD3 Ser <sup>43</sup>                      | 0.81                    | MAGOH Tyr <sup>123</sup>     | 0.92                    | ERK1 Tyr <sup>204</sup>                      | 0.77                    | VIM Tyr <sup>117</sup>                       | 0.69                    |
|                          |                         | ACBD3 Ser <sup>43</sup>                      | 0.74                    | ITSN1 Tyr <sup>1132</sup>                    | 0.79                    | UTRN Tyr <sup>3111</sup>     | 0.90                    | LYN Tyr <sup>306</sup>                       | 0.77                    | PABPC1 Tyr <sup>54</sup>                     | 0.68                    |
|                          |                         | PSAT1 Tyr <sup>346</sup>                     | 0.74                    | ELMO2 Tyr <sup>48</sup>                      | 0.79                    | <b>SHP2 Tyr<sup>62</sup></b> | 0.90                    | TUBB Tyr <sup>340</sup>                      | 0.74                    | DDR2 Tyr <sup>736</sup> , Tyr <sup>740</sup> | 0.67                    |
|                          |                         | ITSN1 Tyr <sup>1054</sup>                    | 0.73                    | PIN4 Tyr <sup>122</sup>                      | 0.78                    | TRAP1 Tyr <sup>498</sup>     | 0.89                    | SDCBP Tyr <sup>50</sup>                      | 0.74                    | ELMO2 Tyr <sup>48</sup>                      | 0.64                    |
|                          |                         | CLTC Tyr <sup>1487</sup>                     | 0.71                    | PLCL2 Tyr <sup>784</sup>                     | 0.76                    | PSMC3 Tyr <sup>132</sup>     | 0.88                    | SNX9 Tyr <sup>269</sup>                      | 0.73                    | HSPA1A Tyr <sup>41</sup>                     | 0.63                    |
|                          |                         | SHIP-2 Tyr <sup>986</sup>                    | 0.70                    | PSAT1 Tyr <sup>346</sup>                     | 0.73                    | TUBGCP3 Tyr <sup>114</sup>   | 0.87                    | LPP Tyr <sup>296</sup>                       | 0.72                    | SDCBP Tyr <sup>50</sup>                      | 0.61                    |
|                          |                         | TUBGCP3 Tyr <sup>114</sup>                   | 0.70                    | AK2 Tyr <sup>190</sup>                       | 0.73                    | PSAT1 Tyr <sup>346</sup>     | 0.85                    | DDR2 Tyr <sup>736</sup>                      | 0.71                    | ITSN1 Tyr <sup>1132</sup>                    | 0.60                    |
|                          |                         | <b>SHP2 Tyr<sup>62</sup></b>                 | 0.69                    | TUBGCP3 Tyr <sup>114</sup>                   | 0.72                    | SHIP-2 Tyr <sup>986</sup>    | 0.85                    | SF3B14 Tyr <sup>86</sup>                     | 0.70                    | ADD1 Tyr <sup>407</sup>                      | 0.60                    |
|                          |                         | DDR2 Tyr <sup>736</sup> , Tyr <sup>740</sup> | 0.69                    | DDR2 Tyr <sup>736</sup> , Tyr <sup>740</sup> | 0.71                    | AK2 Tyr <sup>190</sup>       | 0.77                    | ACBD3 Ser <sup>43</sup>                      | 0.70                    | SF3B14 Tyr <sup>86</sup>                     | 0.59                    |
|                          |                         | TRAP1 Tyr <sup>498</sup>                     | 0.69                    | FASN Tyr <sup>130</sup>                      | 0.70                    | FASN Tyr <sup>130</sup>      | 0.75                    | DDR2 Tyr <sup>684</sup>                      | 0.69                    | IGF2BP3 Tyr <sup>39</sup>                    | 0.59                    |
|                          |                         | DDR1 Tyr <sup>792</sup>                      | 0.69                    | SHIP-2 Tyr <sup>986</sup>                    | 0.70                    | ITSN1 Tyr <sup>1054</sup>    | 0.75                    | VIM Tyr <sup>117</sup>                       | 0.67                    | PLCL2 Tyr <sup>784</sup>                     | 0.59                    |
|                          |                         | AK2 Tyr <sup>190</sup>                       | 0.69                    | <b>SHP2 Tyr<sup>62</sup></b>                 | 0.69                    | PIN4 Tyr <sup>122</sup>      | 0.71                    | DDR2 Tyr <sup>813</sup>                      | 0.67                    | EPS15L1 Tyr <sup>74</sup>                    | 0.58                    |
|                          |                         | PIN4 Tyr <sup>122</sup>                      | 0.69                    | TRAP1 Tyr <sup>498</sup>                     | 0.69                    | AGFG1 Tyr <sup>327</sup>     | 0.70                    | IGF2BP2 Tyr <sup>40</sup>                    | 0.65                    | ANKRD39 Tyr <sup>65</sup>                    | 0.58                    |
|                          |                         | SF3B14 Tyr <sup>61</sup>                     | 0.69                    | CLTC Tyr <sup>1487</sup>                     | 0.68                    | DDR2 Tyr <sup>684</sup>      | 0.68                    | AGFG1 Tyr <sup>327</sup>                     | 0.65                    | DDR2 Tyr <sup>736</sup>                      | 0.57                    |
|                          |                         | FASN Tyr <sup>130</sup>                      | 0.69                    | SF3B14 Tyr <sup>61</sup>                     | 0.65                    | PLCL2 Tyr <sup>784</sup>     | 0.65                    | PABPC1 Tyr <sup>54</sup>                     | 0.63                    | NCK1 Tyr <sup>112</sup>                      | 0.57                    |
|                          |                         | PIK3C2A Tyr <sup>1595</sup>                  | 0.68                    | DDR1 Tyr <sup>792</sup>                      | 0.65                    | SF3B14 Tyr <sup>86</sup>     | 0.64                    | PLCL2 Tyr <sup>784</sup>                     | 0.63                    | JUN Ser <sup>73</sup>                        | 0.57                    |
|                          |                         | GTF2E1 Tyr <sup>91</sup>                     | 0.68                    | GTF2E1 Tyr <sup>91</sup>                     | 0.64                    | DDR2 Tyr <sup>736</sup>      | 0.64                    | HSPA1A Tyr <sup>41</sup>                     | 0.62                    | ACBD3 Ser <sup>43</sup>                      | 0.57                    |
|                          |                         | PFDN6 Tyr <sup>82</sup>                      | 0.68                    | PFDN6 Tyr <sup>82</sup>                      | 0.64                    | ACBD3 Ser <sup>43</sup>      | 0.63                    | ITSN1 Tyr <sup>1054</sup>                    | 0.59                    | PIN4 Tyr <sup>122</sup>                      | 0.55                    |
|                          |                         | DDR2 Tyr <sup>740</sup>                      | 0.68                    | UTRN Tyr <sup>3111</sup>                     | 0.64                    | IGF2BP3 Tyr <sup>39</sup>    | 0.58                    | PIN4 Tyr <sup>122</sup>                      | 0.59                    | ITSN1 Tyr <sup>1054</sup>                    | 0.53                    |
|                          |                         | ACTB Tyr <sup>218</sup>                      | 0.67                    | DDR2 Tyr <sup>740</sup>                      | 0.64                    | SDCBP Tyr <sup>50</sup>      | 0.58                    | BAIAP2 Tyr <sup>491</sup>                    | 0.56                    | SFRS1 Tyr <sup>189</sup>                     | 0.53                    |
|                          |                         | UTRN Tyr <sup>3111</sup>                     | 0.67                    | PIK3C2A Tyr <sup>1595</sup>                  | 0.64                    | NCK1 Tyr <sup>112</sup>      | 0.58                    | AK2 Tyr <sup>190</sup>                       | 0.50                    | SFRS15 Ser <sup>154</sup>                    | 0.52                    |
|                          |                         | LCP1 Tyr <sup>28</sup>                       | 0.66                    | PSMC3 Tyr <sup>132</sup>                     | 0.63                    | ANKRD39 Tyr <sup>65</sup>    | 0.55                    |                                              |                         | CCDC88A Tyr <sup>1799</sup>                  | 0.52                    |
|                          |                         | BANF1 Tyr <sup>43</sup>                      | 0.65                    | ACTB Tyr <sup>218</sup>                      | 0.63                    | EPS15L1 Tyr <sup>74</sup>    | 0.55                    |                                              |                         | SPAG9 Thr <sup>217</sup>                     | 0.52                    |
|                          |                         | PLCL2 Tyr <sup>784</sup>                     | 0.65                    | LYN Tyr <sup>306</sup>                       | 0.62                    | ADD1 Tyr <sup>407</sup>      | 0.55                    |                                              |                         | DDR2 Tyr <sup>684</sup>                      | 0.50                    |
|                          |                         | MAGOH Tyr <sup>123</sup>                     | 0.65                    | BANF1 Tyr <sup>43</sup>                      | 0.62                    | ITSN1 Tyr <sup>1132</sup>    | 0.51                    |                                              |                         |                                              |                         |
|                          |                         | EDC4 Ser <sup>729</sup>                      | 0.65                    | MAGOH Tyr <sup>123</sup>                     | 0.62                    | ELMO2 Tyr <sup>48</sup>      | 0.51                    |                                              |                         |                                              |                         |
|                          |                         | PSMC3 Tyr <sup>132</sup>                     | 0.64                    | LCP1 Tyr <sup>28</sup>                       | 0.62                    | JUN Ser <sup>73</sup>        | 0.51                    |                                              |                         |                                              |                         |
|                          |                         | LYN Tyr <sup>306</sup>                       | 0.58                    | EDC4 Ser <sup>729</sup>                      | 0.61                    | SFRS1 Tyr <sup>189</sup>     | 0.50                    |                                              |                         |                                              |                         |
|                          |                         | SNX9 Tyr <sup>269</sup>                      | 0.57                    | DDR2 Tyr <sup>813</sup>                      | 0.57                    |                              |                         |                                              |                         |                                              |                         |
|                          |                         | TUBB Tyr <sup>340</sup>                      | 0.56                    | SCRIB Tyr <sup>1360</sup>                    | 0.56                    |                              |                         |                                              |                         |                                              |                         |
|                          |                         | RNPS1 Tyr <sup>205</sup>                     | 0.55                    | ERK1 Tyr <sup>204</sup>                      | 0.56                    |                              |                         |                                              |                         |                                              |                         |
|                          |                         | DDR1 Tyr <sup>796</sup>                      | 0.55                    | DDR1 Tyr <sup>796</sup>                      | 0.56                    |                              |                         |                                              |                         |                                              |                         |
|                          |                         | SCRIB Tyr <sup>1360</sup>                    | 0.53                    | RNPS1 Tyr <sup>205</sup>                     | 0.55                    |                              |                         |                                              |                         |                                              |                         |
|                          |                         | ERK1 Tyr <sup>204</sup>                      | 0.53                    | SNX9 Tyr <sup>269</sup>                      | 0.54                    |                              |                         |                                              |                         |                                              |                         |
|                          |                         | VIM Tyr <sup>117</sup>                       | 0.50                    | TUBB Tyr <sup>340</sup>                      | 0.52                    |                              |                         |                                              |                         |                                              |                         |
|                          |                         | DDR2 Tyr <sup>813</sup>                      | 0.50                    | LPP Tyr <sup>296</sup>                       | 0.50                    |                              |                         |                                              |                         |                                              |                         |

**Table S7 Correlation analysis for phosphorylation of SHP-2 Tyr<sup>62</sup> and Tyr<sup>542</sup>**

HEK-293-DDR2 cells were treated with 20  $\mu$ g/ml collagen I and harvested across a range of different time points. For each time point, equivalent lysates were harvested for both SRM and ELISA experiments. Each sample represents a time point after collagen stimulation of cells. Data have been normalized to sample 15. Spearman correlation coefficient  $r = 0.9321$ ,  $P < 0.0001$ .

| Sample | ELISA (Tyr <sup>542</sup> ) | SRM (Tyr <sup>62</sup> ) |
|--------|-----------------------------|--------------------------|
| 1      | 0.137                       | 0.063                    |
| 2      | 0.362                       | 0.283                    |
| 3      | 0.521                       | 0.403                    |
| 4      | 0.541                       | 0.336                    |
| 5      | 0.620                       | 0.360                    |
| 6      | 0.655                       | 0.525                    |
| 7      | 0.699                       | 0.391                    |
| 8      | 0.809                       | 0.457                    |
| 9      | 0.848                       | 0.618                    |
| 10     | 0.969                       | 1.870                    |
| 11     | 1.099                       | 0.664                    |
| 12     | 1.107                       | 0.719                    |
| 13     | 1.177                       | 2.891                    |
| 14     | 1.868                       | 3.083                    |
| 15     | 1.000                       | 1.000                    |

Received 21 November 2012/1 July 2013; accepted 4 July 2013

Published as BJ Immediate Publication 4 July 2013, doi:10.1042/BJ20121750
